# Supplementary material for: A phosphoinositide switch mediates exocyst recruitment to multivesicular endosomes for exosome secretion
Source: PubMed Central journal article supplement (PMC10613218; doi:10.1038/s41467-023-42661-0), 2023-10-28
Supplement: 41467_2023_42661_MOESM1_ESM.pdf [file 41467_2023_42661_MOESM1_ESM.pdf]

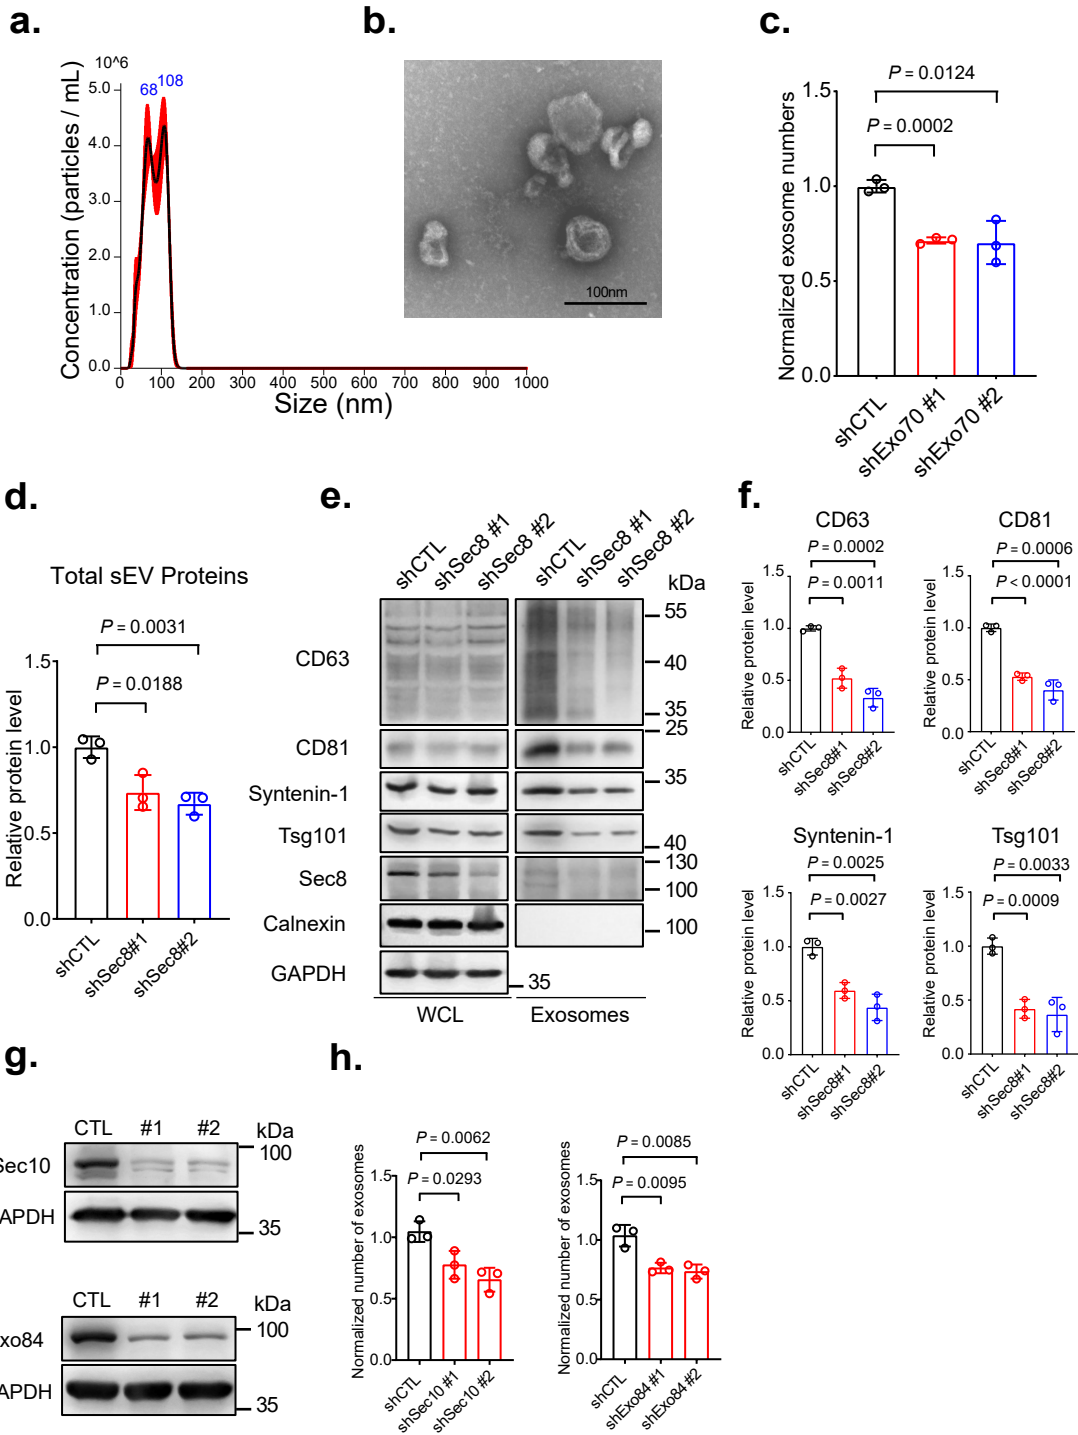

**Supplementary Data Fig. 1. Exo70 and Sec8 regulate the secretion of exosomes. a.**

A representative NTA of size distribution of exosomes isolated from MDA-MB-231 cell media. Blue numbers represent the peak size of EVs. Red area represents the variance. **b.** A representative negatively stained TEM image of isolated exosomes from MDA-MB-231 cells. Scale bar = 100 nm. **c.** NTA of exosome secreted from cells stably expressing control or Exo70 shRNAs (n = 3). The average number of exosomes isolated from cells expressing Exo70 shRNA is normalized to that of control samples. **d.** Quantification of exosomal proteins from cells treated with control and Sec8 shRNAs (n = 3). **e.** Western blot analysis of whole cell lysates (WCL) and exosomes isolated from cells stably expressing either control or Sec8 shRNAs. Exosomes from equal amounts of cells ( $1 \times 10^7$ ) were collected for Western blot analysis. **f.** Quantification of the levels of CD63, CD81, Syntenin-1, and Tsg101 on exosomes from the cells expressing either control or Sec8 shRNAs (n = 3). The average amount of exosomal proteins from cells expressing Sec8 shRNA is normalized to that from control samples. **g.** Western blot analysis of shRNA knockdown of Sec10 and Exo84. **h.** NTA of exosome secretion from cells stably expressing either control, Sec8, or Exo84 shRNAs (n = 3). The average number of exosomes isolated from cells expressing Sec8 or Exo84 shRNA is normalized to that of control samples. Data are presented as mean  $\pm$  s.d. of three independent biological replicates. P values are calculated using two-sided unpaired t-test.

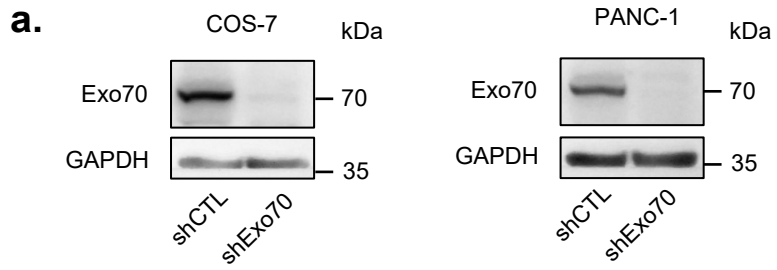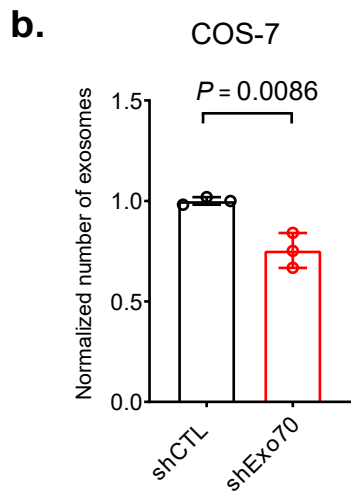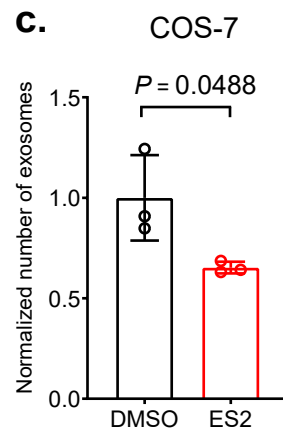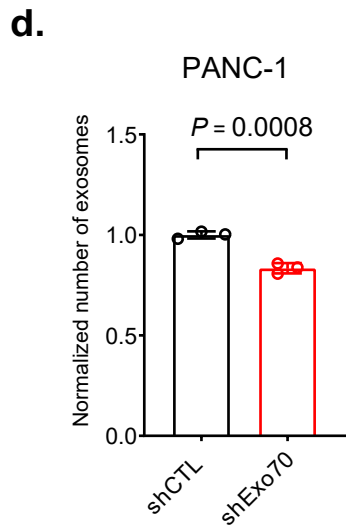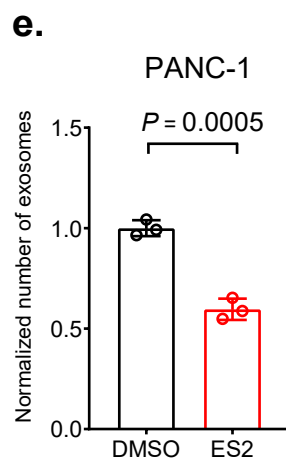

**Supplementary Data Fig. 2. Exo70 regulates the secretion of exosomes in COS-7 and PANC-1 cells.** **a.** Western blotting shows the knockdown of Exo70 in COS-7 and PANC-1 cells expressing shRNA targeting Exo70 as compared with cells expressing scrambled shRNA (shCTL). **b, c.** NTA of exosome secretion from COS-7 cells stably expressing control or Exo70 shRNAs (**b**, n=3) or treated with DMSO or ES2 (**c**, n = 3). The average numbers of exosomes isolated from treated cells are normalized to that in control samples. **d, e.** NTA of exosome secretion from PANC-1 cells stably expressing control or Exo70 shRNAs (**d**, n = 3) or treated with DMSO or ES2 (**e**, n = 3). The average numbers of exosomes isolated from treated cells are normalized that in control samples. Data are presented as mean  $\pm$  s.d. of three independent biological replicates. P values are calculated using two-sided unpaired t-test.



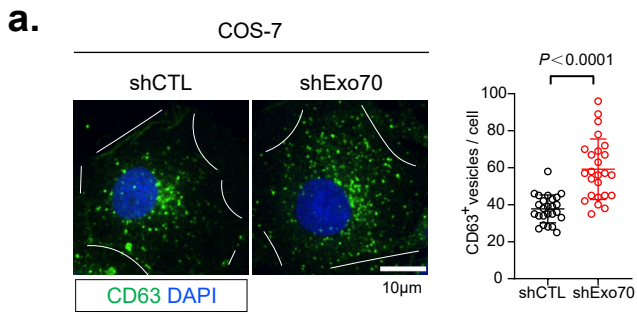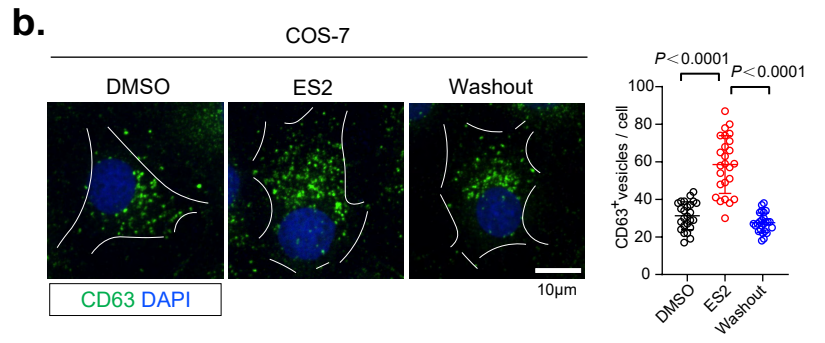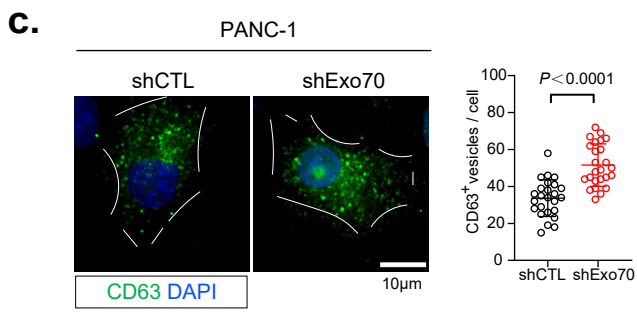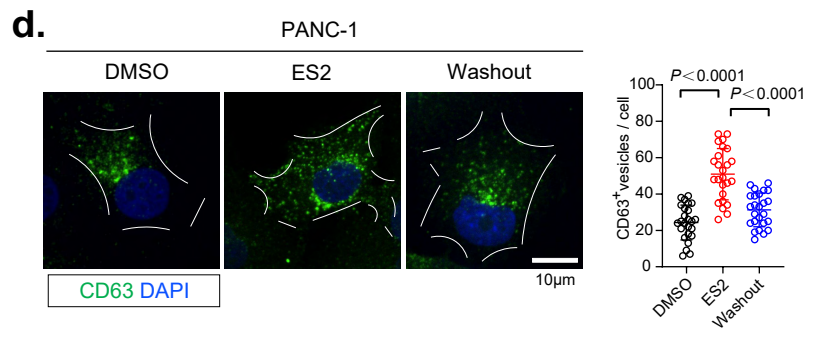

**Supplementary Data Fig. 3. Exo70 regulates the trafficking of MVEs in COS-7 and PANC-1 cells.** **a.** Imaging (left) and quantification (right) of MVEs marked by CD63 in COS-7 cells stably expressing control or Exo70 shRNAs (n = 25 cells). Scale bar = 10  $\mu$ m. **b.** Imaging (left) and quantification (right) of MVEs marked by CD63 in COS-7 cells treated with DMSO, ES2, or after washout of ES2. Scale bar = 10  $\mu$ m (n = 25 cells). **c.** Imaging (left) and quantification (right) of MVEs marked by CD63 in PANC-1 cells stably expressing the control or Exo70 shRNAs (#1 and #2) (n = 25 cells). **d.** Imaging (left) and quantification (right) of MVEs marked by CD63 in PANC-1 cells treated with DMSO, ES2, or after washout of ES2. Scale bar = 10  $\mu$ m (n = 25 cells). P values are calculated using two-sided unpaired t-test.

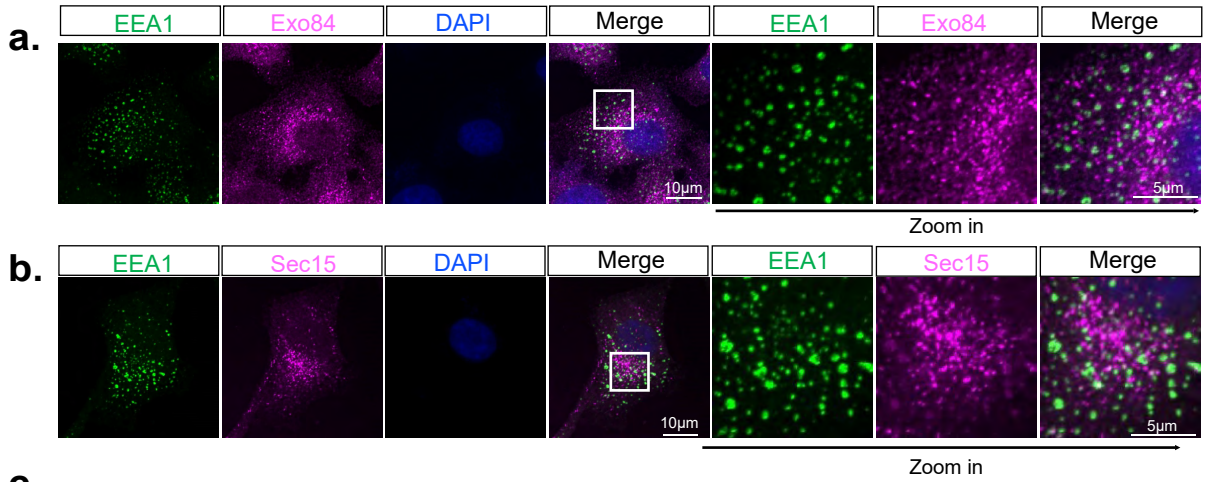

**c.**

An example of Exocyst positive vesicles

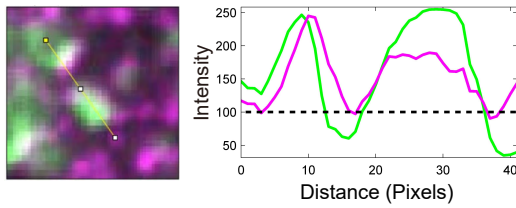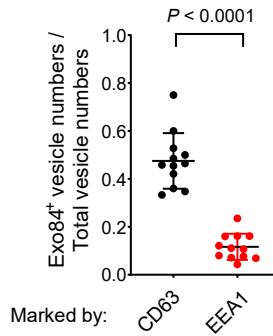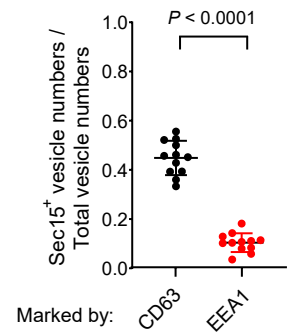

**Supplementary Data Fig. 4. Analysis of the association of Exo84 and Sec15 with vesicles.** **a.** Immunostaining of Exo84 and EEA1. Zoom-in view of the boxed region is shown at the right. **b.** Immunostaining of Sec15 and EEA1. Zoom-in view of the boxed region is shown at the right. Scale bars are indicated in the panels. **c.** A representative image of Exo84 association with CD63 vesicles is shown at the left. The intensity profile shows two vesicles with colocalized Exo84-CD63 signal above the background signal. Analysis of exocyst positive subpopulation of MVEs (CD63) or early endosomes (EEA1) (see *Materials and Methods*) are shown at right (n = 12 cells). P values were calculated using two-sided unpaired t-test.

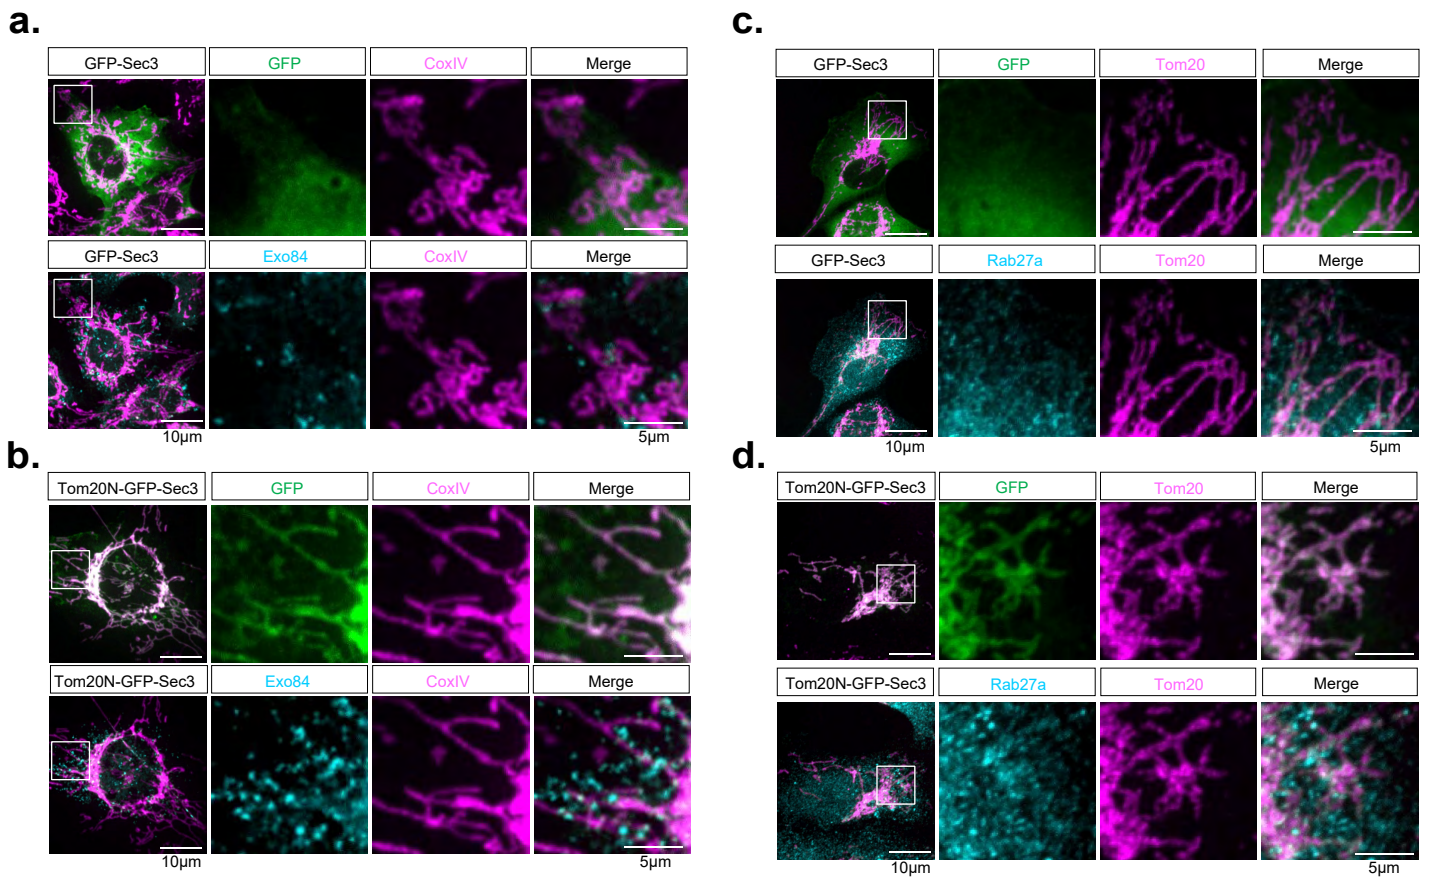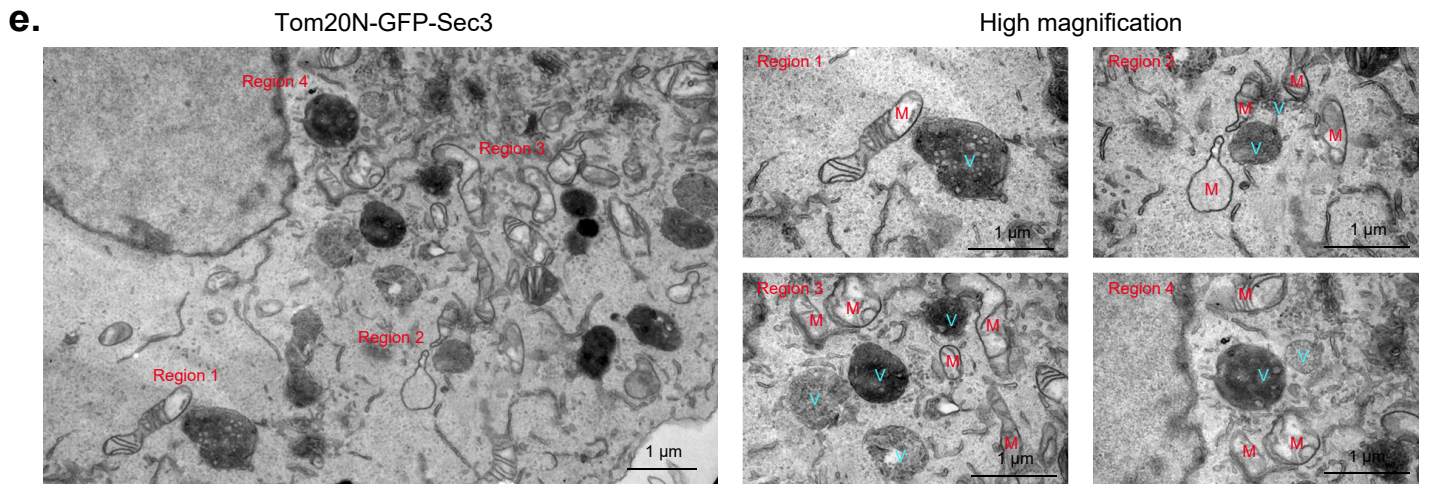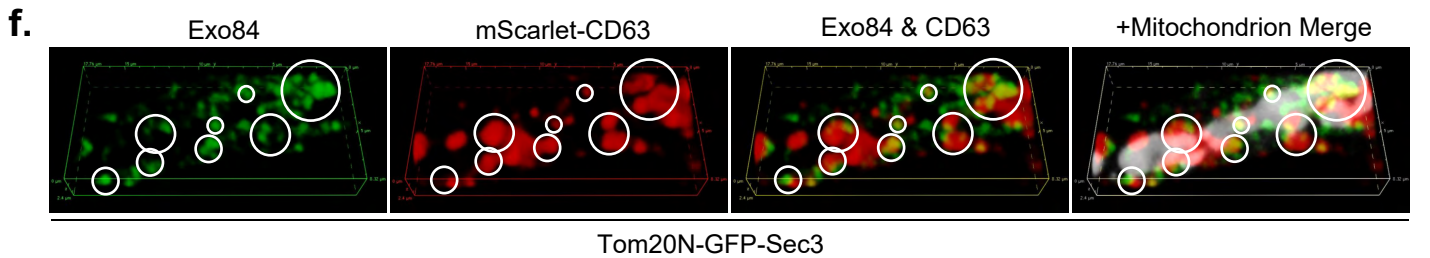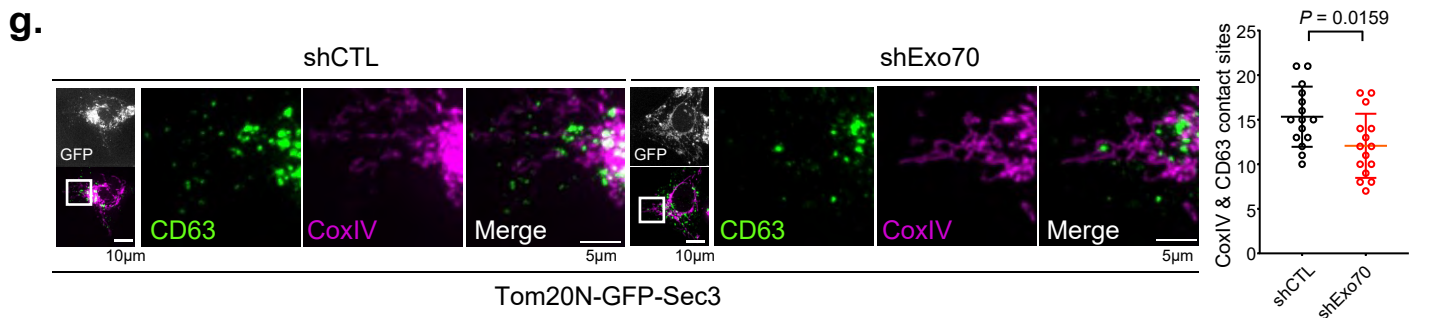

**Supplementary Data Fig. 5. Mitochondria-targeted Sec3 redirects Exo84 and Rab27a-positive vesicles to mitochondria.** **a.** Localization of CoxIV, GFP-Sec3, and Exo84 in cells. The boxed regions are magnified on the right. **b.** Localization of CoxIV, Tom20N-GFP-Sec3, and Exo84 in cells. Exo84 is recruited to the mitochondria marked by Tom20N-GFP-Sec3 and CoxIV. **c.** Localization of Tom20, GFP-Sec3, Rab27a in cells. Endogenous Tom20 was stained with an antibody that recognizes the full-length protein but not the Tom20 N-terminal fragment (a.a. 1-47). **d.** Localization of Tom20, Tom20N-GFP-Sec3, Rab27a in cells. Rab27a is recruited to the mitochondria marked by Tom20N-GFP-Sec3. The boxed regions in **c** and **d** are magnified on the right. Scale bars are indicated in the panels. **e.** EM images of a representative cell expressing Tom20N-GFP-Sec3. Four regions are shown at higher magnification. “V”, vesicles, “M”, mitochondria. Direct contacts of mitochondria and MVEs are shown. Scale bars = 1  $\mu\text{m}$ . **f.** 3D reconstruction of the association of MVEs with mitochondria in Tom20N-GFP-Sec3 expressing cells. Regions of colocalization of Exo84 (green) and mScarlet-CD63 (magenta) are indicated by circles. Mitochondria marked by Tom20N-GFP-Sec3 are rendered grey. **g.** Left, Tom20-GFP-Sec3 localized to the mitochondria cells expressing the scramble shRNA and the shRNA targeting Exo70. The quantification of MMCSs was shown on the right (n = 15). Right, Tom20-GFP-Sec3 localized to the mitochondria cells treated with DMSO and ES2 (n = 15). The quantification of MMCSs was shown on the right (n = 15). Scale Bars are indicated in the panels. P values were calculated using two-sided unpaired t-test.



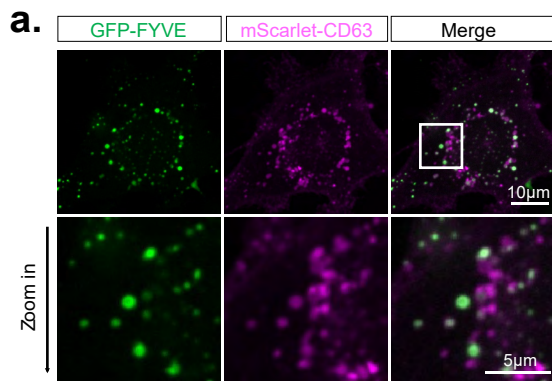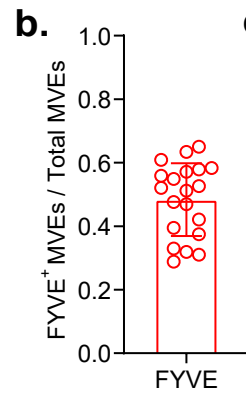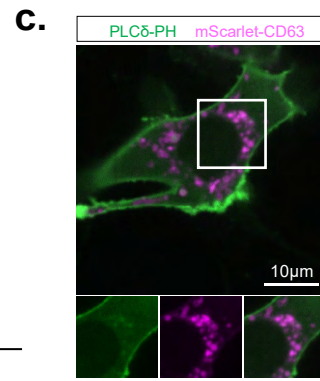

**Supplementary Data Fig. 6. Detection of PI(3)P and PI(4,5)P2 in cells.** **a.** PI(3)P labeled by GFP-FYVE was localized to some of the mScarlet-CD63 positive MVEs. Zoom-in images of the boxed region are shown at the lower panel. **b.** Quantification of the GFP-FYVE positive subpopulation is shown at the right (n = 20 cells). Scale bars are indicated in the panels. P values were calculated using two-sided unpaired t-test. **c.** PI(4,5)P labeled by PLC-PH showed mostly plasma membrane distribution and limited colocalization with mScarlet-CD63 positive MVEs. The boxed region is shown at the lower panel.



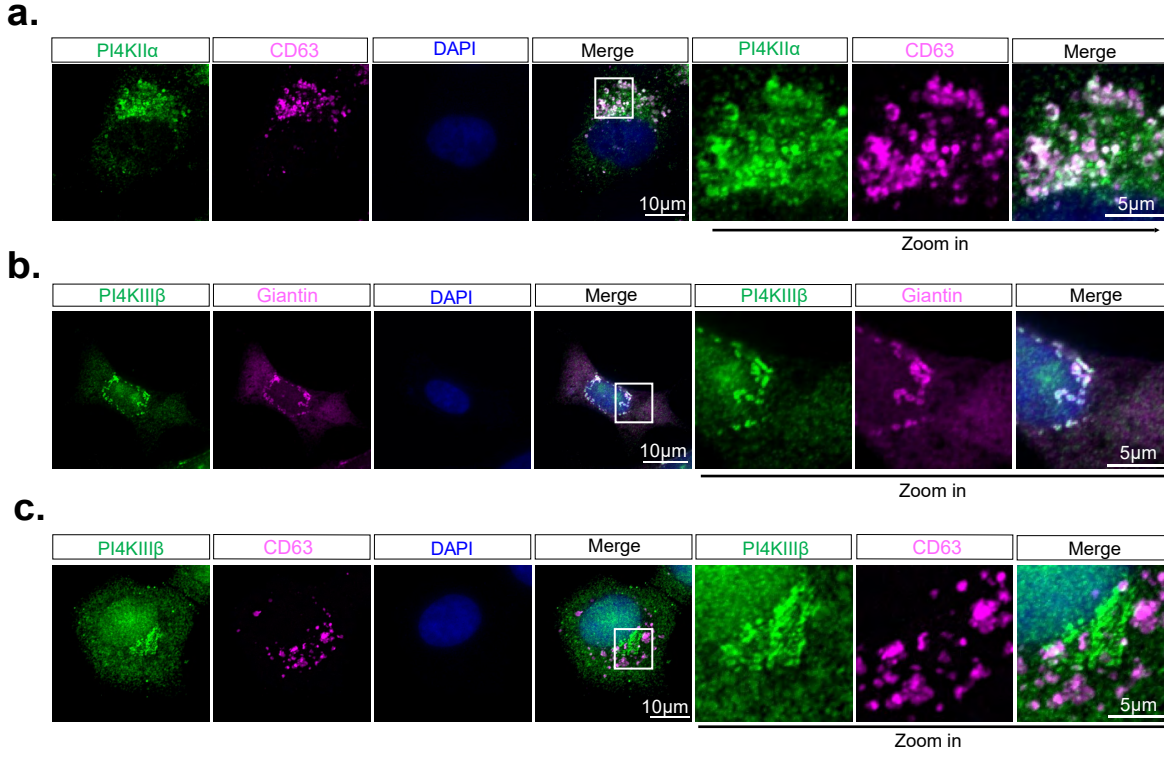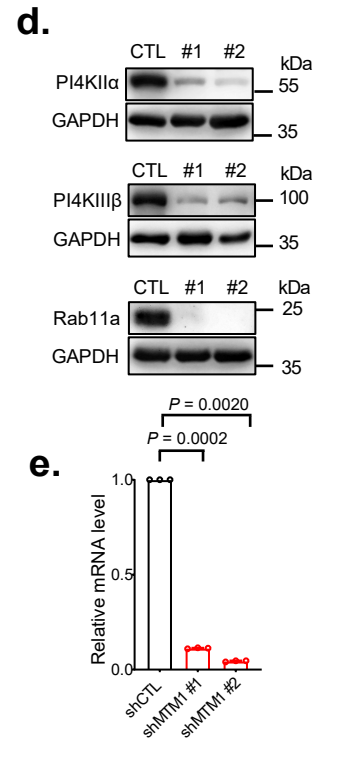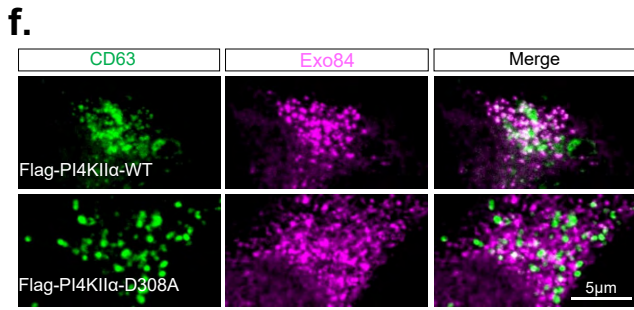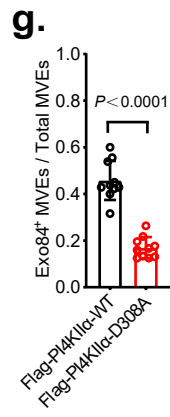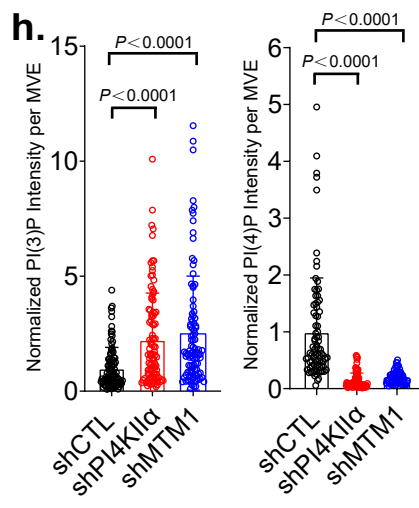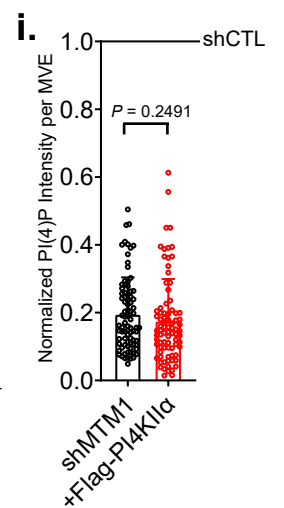

**Supplementary Data Fig. 7. PI4KII $\alpha$ , MTM1, and Rab11 are needed for the recruitment of the exocyst to MVEs.** **a.** Co-localization of PI4KII $\alpha$  (green) and CD63 (magenta) in cells. Zoom-in images of the boxed region are shown at right. Scale bars are indicated in the panels. **b.** Localization of PI4KIII $\beta$  (green) to the Golgi (marked by Giantin, magenta) in MDA-MB-231 cells. The nucleus is stained with DAPI. **c.** Localization of PI4KIII $\beta$  (green) and CD63 (magenta) in MDA-MB-231 cells. Scale bars are indicated in the panels. **d.** Western blotting showing the shRNA-mediated knockdown of PI4KIII $\alpha$ , PI4KIII $\beta$ , and Rab11a. **e.** RT-qPCR quantification of MTM1 mRNA level in cells stably expressing control or MTM1 shRNAs. P-values were calculated using one-sample t-tests. **f.** Immunostaining of Exo84 (magenta) and CD63 (green) in stable PI4KII $\alpha$  knockdown cells (shRNA targeting 3' UTR) expressing Flag-PI4KII $\alpha$ -WT or Flag-PI4KII $\alpha$ -D308A. Scale bars = 5  $\mu$ m. **g.** Subpopulation of Exo84-positive MVEs in stable PI4KII $\alpha$  knockdown cells expressing Flag-PI4KII $\alpha$ -WT or Flag-PI4KII $\alpha$ -D308A (n = 10 cells per condition). P values are calculated using a two-sided unpaired t-test. **h.** Quantification of PI(3)P (n = 99 vesicles) or PI(4)P (n = 83 vesicles) intensity per MVE in cells expressing the control, PI4KII $\alpha$ , or MTM1 shRNAs. The average phosphoinositide intensity in cells expressing PI4KII $\alpha$  or MTM1shRNA is normalized to that of control. P values were calculated using two-sided unpaired Welch's t-test. **i.** Quantification of PI(4)P (n = 83 vesicles) intensity level per MVE in MTM1 knockdown cells with or without Flag-PI4KII $\alpha$  expression normalized to the average PI(4)P intensity level in cells expressing control shRNA (shCTL). P values were calculated using two-sided unpaired t-test unless specifically noted.

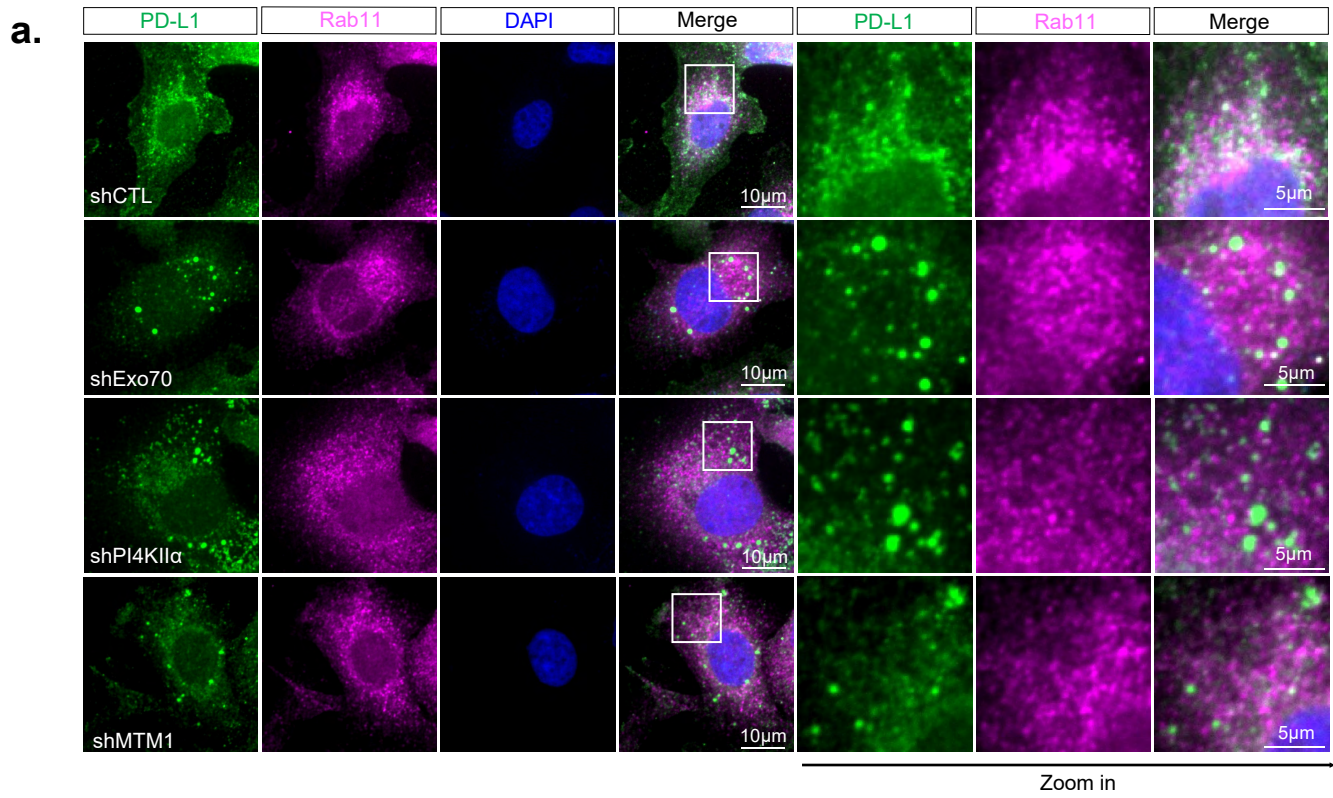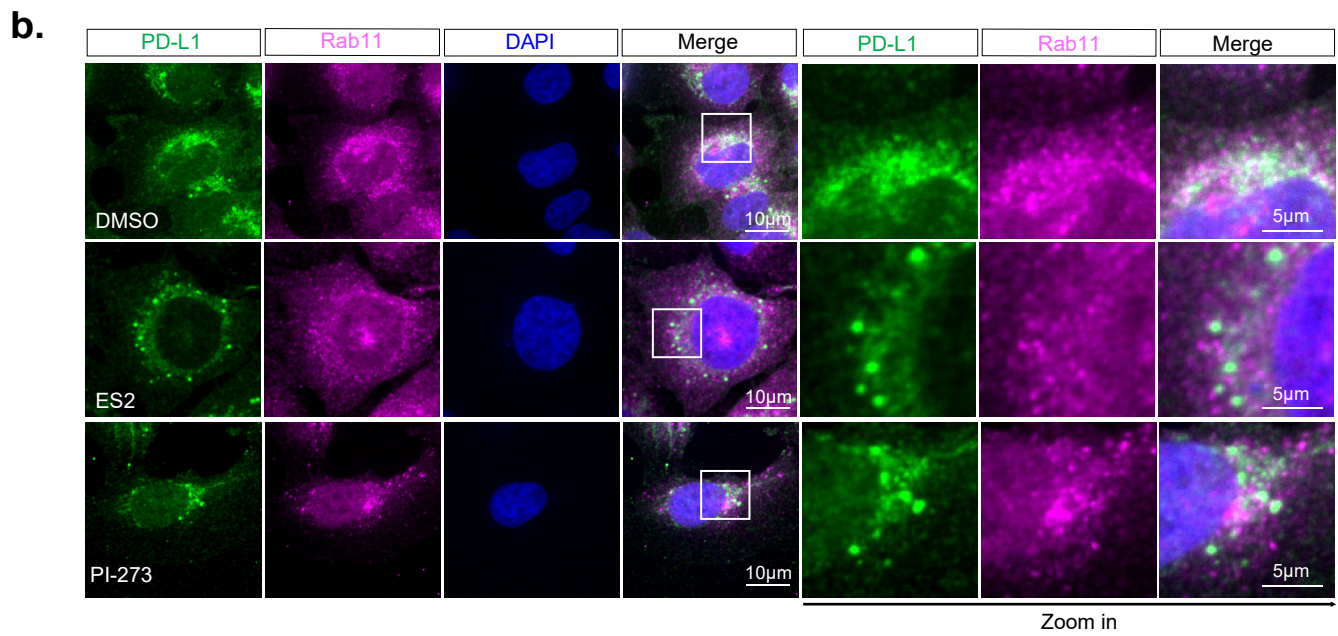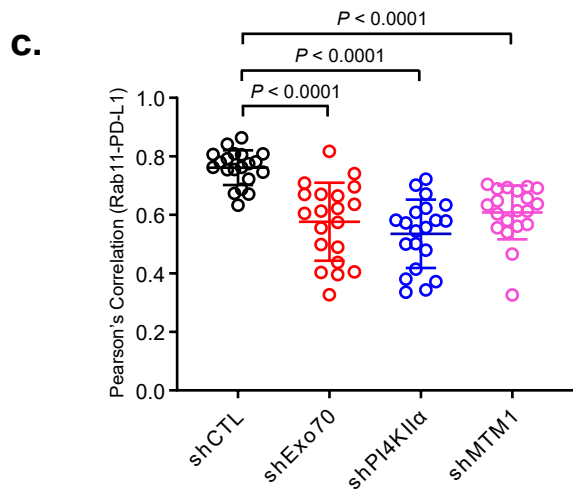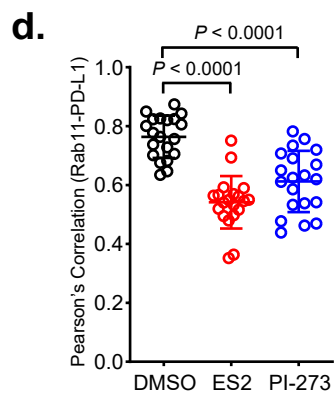

**Supplementary Data Figure 8. Localization of PD-L1 in cells with inhibition of Exo70, PI4KII $\alpha$ , or MTM1.** **a.** Localization of PD-L1 and Rab11 in MDA-MB-231 cells stably expressing control shRNA or shRNAs targeting Exo70, PI4KII $\alpha$ , or MTM1. Zoom-in images of the boxed regions are shown to the right. Scale bar = 10  $\mu$ m. **b.** Localization of PD-L1 and Rab11 in cells treated with DMSO, ES2, or PI-273. Zoom-in images of the boxed regions are shown to the right. **c.** Colocalization analysis of PD-L1 and Rab11 by Pearson's correlation coefficient in cells treated different shRNAs (n = 20 cells per condition). **d.** Colocalization analysis of PD-L1 and Rab11 by Pearson's correlation coefficient in cells treated with DMSO, ES2, or PI-273 (n = 20 cells per condition). P values are calculated using a two-sided unpaired t-test. Scale bars are indicated in the panels.



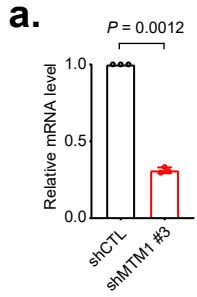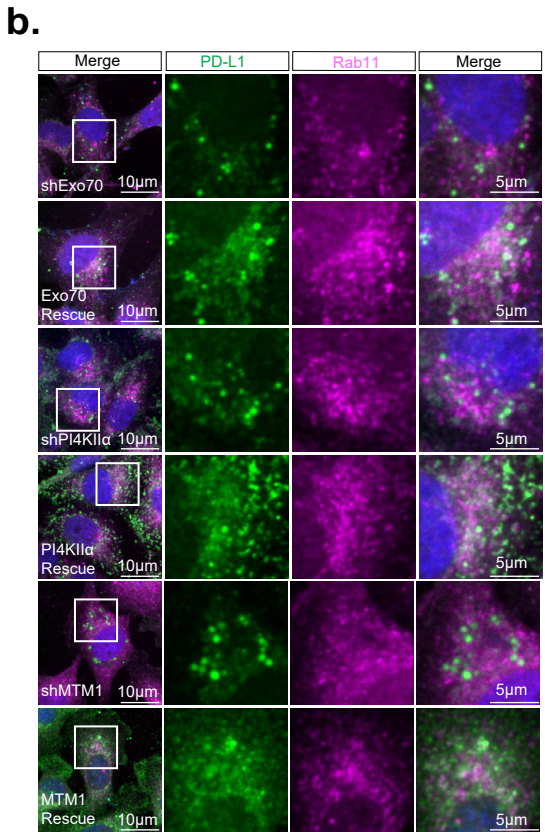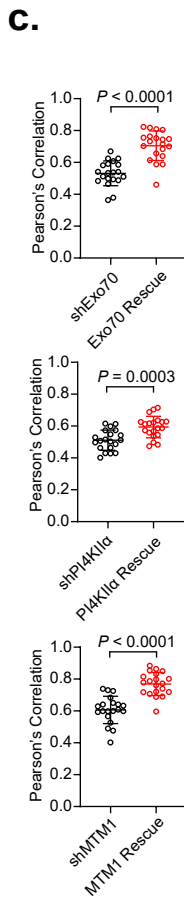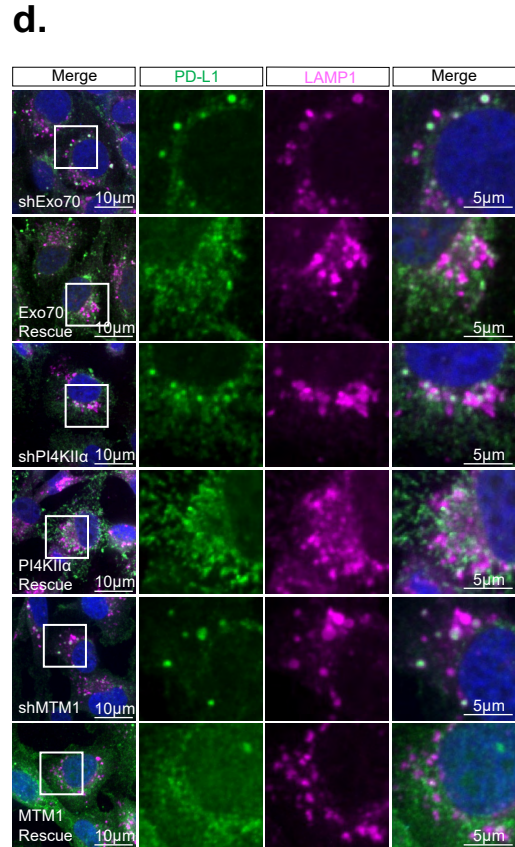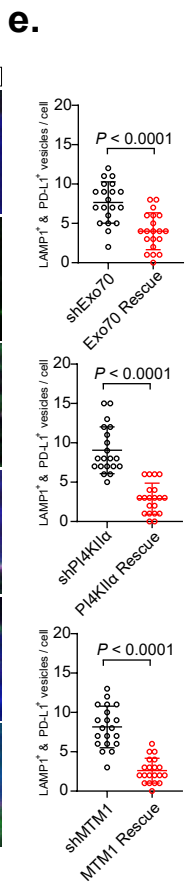

**Supplementary Data Fig. 9. Rescue experiments in cells with Exo70, PI4KII $\alpha$ , or MTM1 knockdown.** **a.** RT-qPCR of MTM1 mRNA in cells expressing control shRNA or shRNA targeting the 3' UTR of MTM1. P-value is calculated using one sample t-test. **b.** Localization of PD-L1 and Rab11 in MDA-MB-231 cells stably expressing control shRNA or shRNAs targeting Exo70, PI4KII $\alpha$ , or MTM1 with or without expression of corresponding rescue plasmids (shExo70 is rescued by Flag-rExo70, PI4KII $\alpha$  is rescued by Flag-PI4KII $\alpha$ -WT, and shMTM1 is rescued by mCherry-MTM1). Zoom-in images of the boxed regions are shown in the right column. Scale bar = 10  $\mu$ m. **c.** Quantification of the Pearson's correlation coefficients for the data in **b.** **d.** Confocal imaging of PD-L1 in cells stably expressing the control shRNA or shRNAs targeting Exo70, PI4KII $\alpha$ , or MTM1 with their corresponding rescues. LAMP1 is used as a lysosome marker. Zoom-in images of the boxed regions are shown to the right. **e.** Quantification of the LAMP1 positive PD-L1 puncta numbers for the data in **d.** n = 20 cells for all experiments. P values are calculated using a two-sided unpaired t-test unless independently indicated.

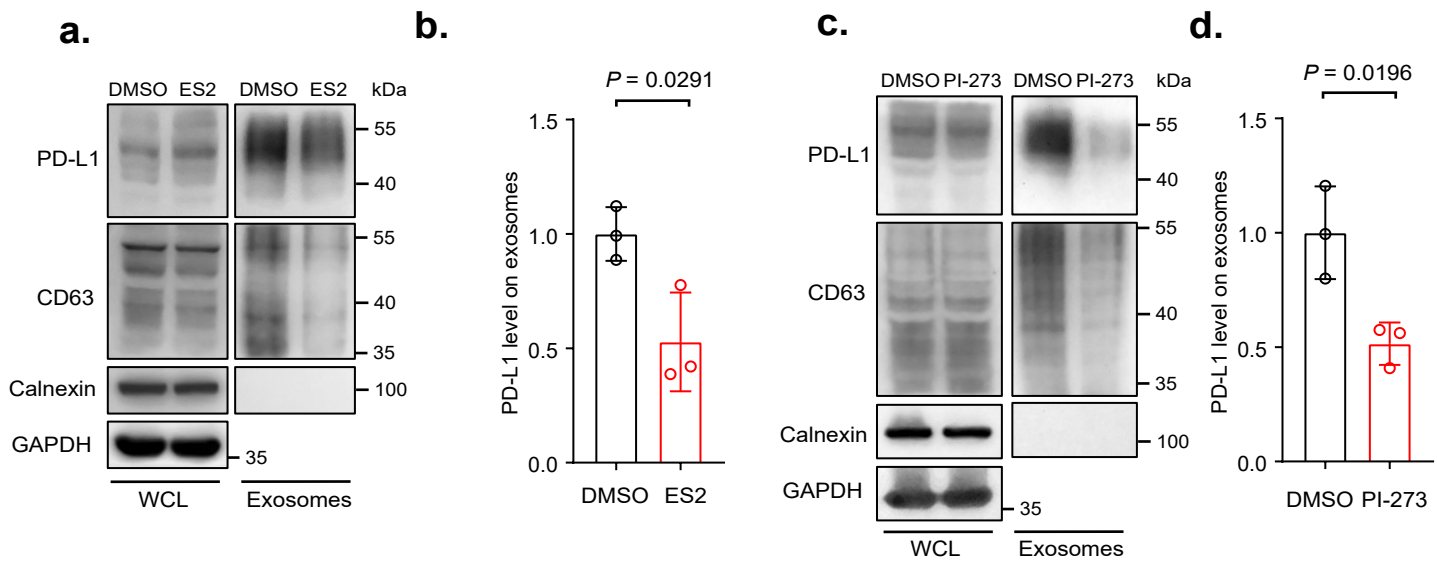

**Supplementary Data Fig. 10. Pharmacological inhibition of exosomal secretion of PD-L1.** **a.** Immunoblotting of PD-L1 in the whole cell lysates and exosomes from DMSO or ES2 treated cells. CD63 is used as an exosome marker. Calnexin is used as a negative control. GADPH is used as a loading control. **b.** Quantification of PD-L1 levels in exosomes from DMSO or ES2 treated cells (n=3). **c.** Immunoblotting of PD-L1 in the whole cell lysates and exosomes from DMSO or PI-273 treated cells. **d.** Quantification of PD-L1 levels on exosomes from DMSO or PI-273 treated cells (n=3). The average exosomal PD-L1 level from cells treated with PI-273 is normalized to that of the DMSO-treated control. Data are presented as mean  $\pm$  s.d. of three independent biological replicates. P values are calculated using a two-sided unpaired t-test. The loading of exosome sample was normalized to the same cell number ( $1 \times 10^7$ ).



**Supplementary Data Table 1. Antibodies for IF and WB**

| Antibody Name                           | Source                        | Catalogue No.                                | Application             |
|-----------------------------------------|-------------------------------|----------------------------------------------|-------------------------|
| Sec8                                    | Santa-Cruz                    | B-11:sc-514215                               | WB(1:1000)              |
| Sec10                                   | Santa-Cruz                    | C-4: sc-514802                               | WB(1:1000)              |
| Sec15                                   | Guo Lab                       | N/A                                          | WB(1:1000), IF(1:100)   |
| Exo70                                   | Santa-Cruz                    | D6:sc-365825                                 | WB(1:1000)              |
| Exo84                                   | Santa-Cruz                    | H1:sc-515532<br>Lot: H0918<br>(Batch number) | WB(1:1000), IF(1:100)   |
| CD63                                    | Abcam                         | ab134045<br>ab8219                           | WB(1:1000)<br>IF(1:250) |
| CD63-FITC                               | Herlyn Lab                    | N/A                                          | IF(1:100)               |
| CD81                                    | CST                           | (D3N2D) #56039                               | WB(1:1000)              |
| Calnexin                                | CST                           | (C5C9) #2679                                 | WB(1:1000)              |
| EEA1                                    | CST                           | (C45B10) #3288                               | WB(1:1000), IF(1:200)   |
| Giantin                                 | Guo Lab                       | N/A                                          | IF(1:500)               |
| LAMP1                                   | CST                           | (D2D11) XP®<br>#9091                         | IF(1:200)               |
| Rab11                                   | Invitrogen                    | 715300                                       | WB(1:1000), IF(1:100)   |
| Rab27a                                  | CST                           | (D7Z9Q) #69295                               | IF(1:100)               |
| CoxIV                                   | CST                           | (3E11) #4850                                 | IF(1:200)               |
| Tom20                                   | Santa-Cruz                    | F10:sc-17764                                 | WB(1:1000), IF(1:200)   |
| Flag                                    | Sigma-<br>Aldrich             | m2 slcc4005                                  | IF(1:100)               |
| PI4KII $\alpha$                         | Santa-Cruz                    | B5:sc-390026                                 | WB(1:1000), IF(1:100)   |
| PI4KIII $\beta$                         | Santa-Cruz<br>BD              | E4:sc-166615<br>(BD) 611817                  | IF(1:100)<br>WB(1:1000) |
| PD-L1                                   | CST                           | (E1L3N®) XP®<br>#13684                       | WB(1:1000)              |
| PD-L1 (5H1)                             | Dong Lab                      | N/A                                          | IF(1:100)               |
| GAPDH                                   | CST                           | (D16H11) XP®<br>#5174                        | WB(1:1000)              |
| Syntenin-1                              | Abcam                         | ab133267                                     | WB(1:1000)              |
| Tsg101                                  | Santa-Cruz                    | C-2: sc-7964                                 | WB(1:1000)              |
| DNA-conjugated<br>donkey anti-mouse IgG | Jackson<br>Immuno<br>Research | 715-005-150                                  | IF(1:200)               |

**Supplementary Data Table 2. Short hairpin RNAs (shRNAs) Sequences**

| <b>Gene Name</b> | <b>shRNA sequence</b>                                                                                                                                     |
|------------------|-----------------------------------------------------------------------------------------------------------------------------------------------------------|
| Scramble         | CCTAAGGTTAAGTCGCCCTCGCTCGAGCGAGGGCGACTTA<br>ACCTTAGGTTTTT ( <a href="https://www.addgene.org/protocols/plko">https://www.addgene.org/protocols/plko</a> ) |
| Sec8             | #1: CCCTAATTTCTGAGAGAATAA<br>#2: CCCAGAAACAGTTAAGGCAAT                                                                                                    |
| Sec10            | #1: TTAGACAGCGTACCAACTTAC<br>#2: AGCAAGCTGATGGAGTTTAAT                                                                                                    |
| Exo70            | #1: AACATGGTGTCTATCTTATCA<br>#2: GCTGCAGGAGAATGTTGAGAA                                                                                                    |
| Exo84            | #1: GCTGTTTCAGCATGTGGATTAT<br>#2: ATGCAGAGAGAGAGCTTATAT                                                                                                   |
| PI4KII $\alpha$  | #1: GAGCTAGTCTTAGCATTTATA<br>#2: CCTCTTCCTGAGAACACTAAC                                                                                                    |
| PI4KIII $\beta$  | #1: GCAAGAAACACGAAGGATCAT<br>#2: GAGATCCGTTGCCTAGATGAT                                                                                                    |
| MTM1             | #1: GCCATTCAAGTAGCAGACAAA<br>#2: TATGAGTGGGAAACGAAATAA<br>#3: CCGCATTAGAGCTCGAAATAA                                                                       |
| Rab11a           | #1: ATCATGCTGATAGTAACATTG<br>#2: TGGTTTGTTCATTTCATTGAAA`                                                                                                  |
